# Supplementary material for: A single lithium-ion conducting monomer as a SEI-forming additive for lithium-ion batteries
Source: Royal Society of Chemistry journal article supplement (doi:10.1039/d5ta00347d), 2025-01-01
Supplement: d5ta00347d1.pdf [file d5ta00347d1.pdf]

## Electronic Supplementary Information

### Single lithium-ion conducting monomer as a SEI-forming additive for lithium-ion batteries

Jin-Hong Seok<sup>a</sup>, Seongjae Lee<sup>a</sup>, Da-Ae Lim<sup>a</sup>, Kyoung Ho Ahn<sup>b</sup>, Chul Haeng Lee<sup>b</sup>, Kyeounghak Kim<sup>a</sup> and Dong-Won Kim<sup>\*a</sup>

<sup>a</sup>Department of Chemical Engineering, Hanyang University, Seoul 04763, Republic of Korea

<sup>b</sup>Battery R&D, LG Energy Solution, Ltd, Daejeon 34122, Republic of Korea

\* Corresponding author: [dongwonkim@hanyang.ac.kr](mailto:dongwonkim@hanyang.ac.kr).

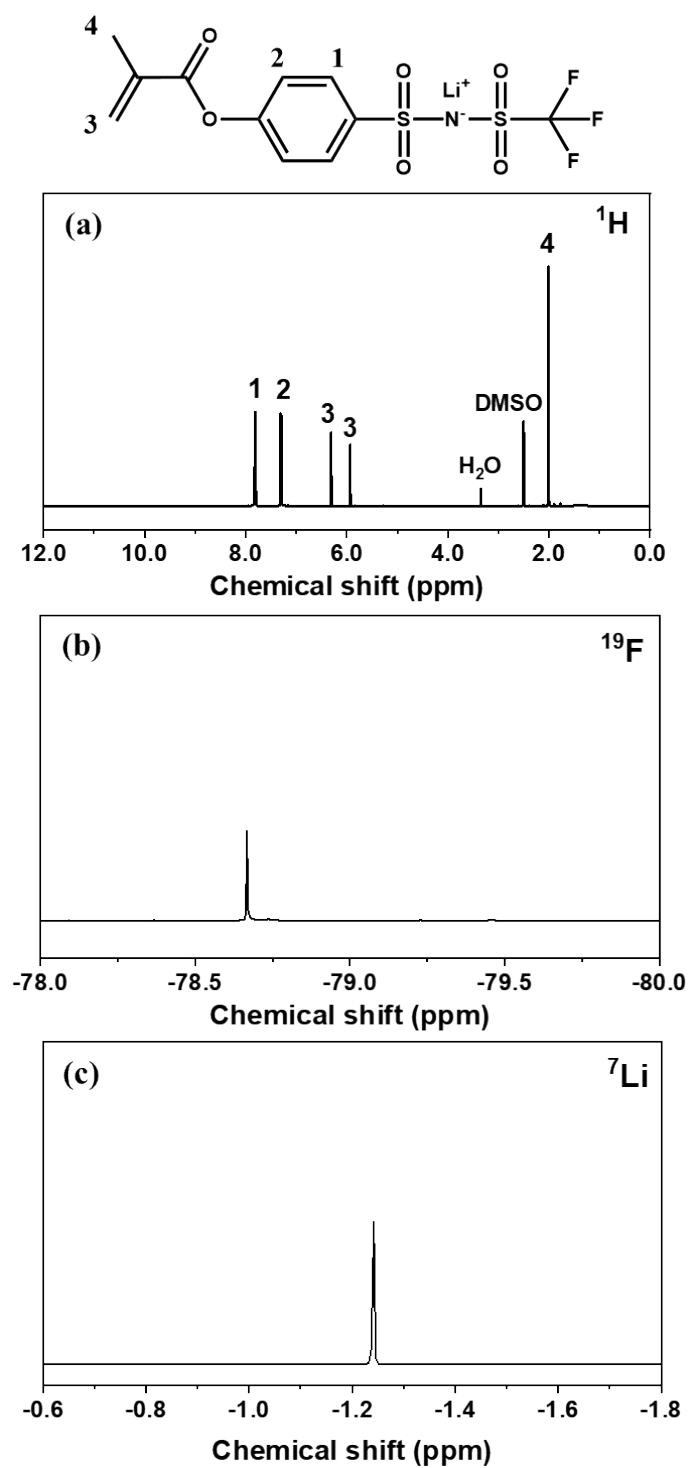

**Fig. S1.** (a)  $^1\text{H}$ , (b)  $^{19}\text{F}$  and (c)  $^7\text{Li}$  NMR spectra of LiMPTFSI.

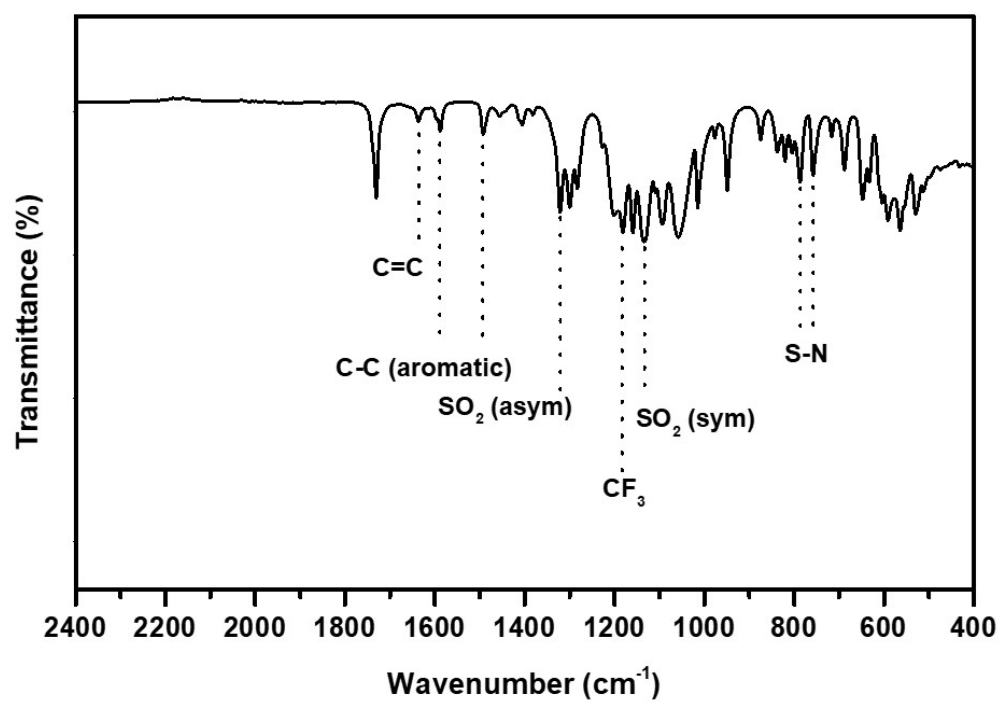

**Fig. S2.** FT-IR spectrum of LiMPTFSI.

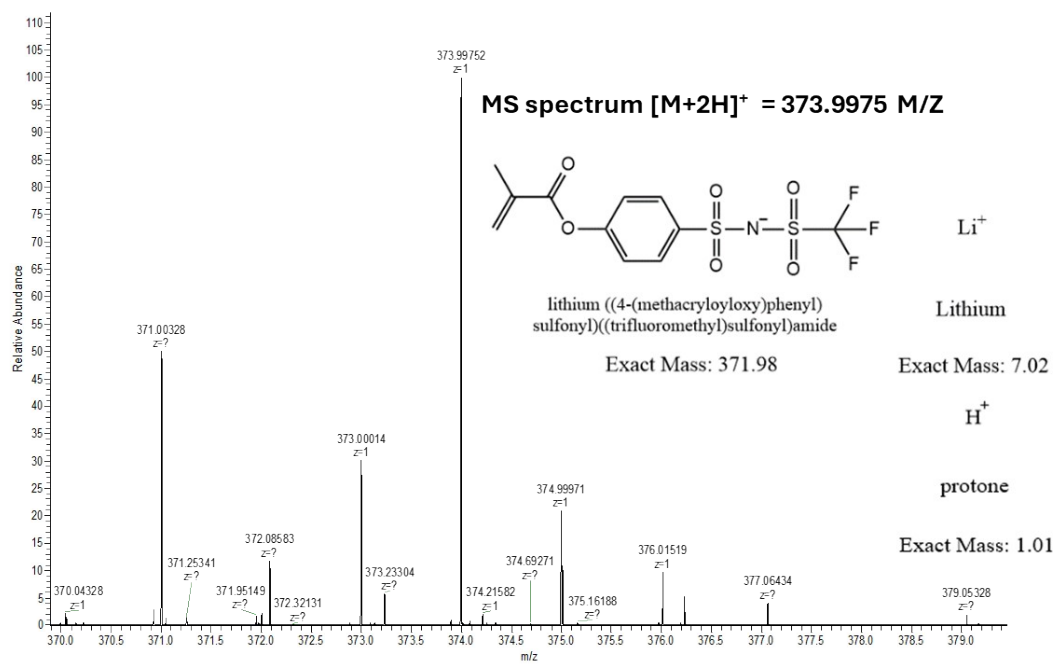

**Fig. S3.** Liquid chromatography mass spectrum of LiMPTFSI.

(a)

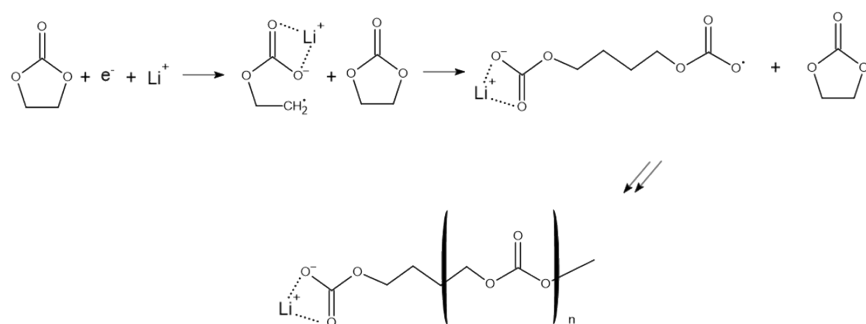

(b)

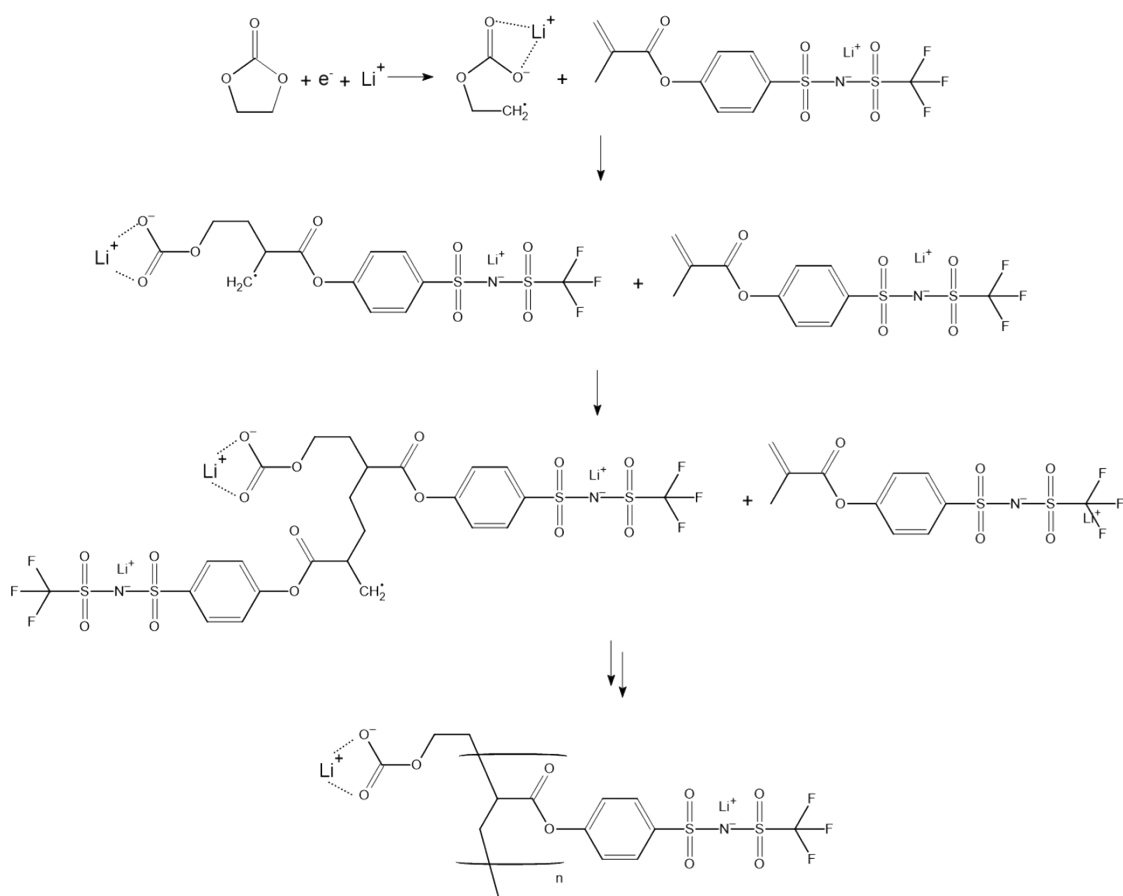

**Fig. S4.** Polymerization pathways of (a) EC and (b) LiMPTFSI by EC radical initiation.

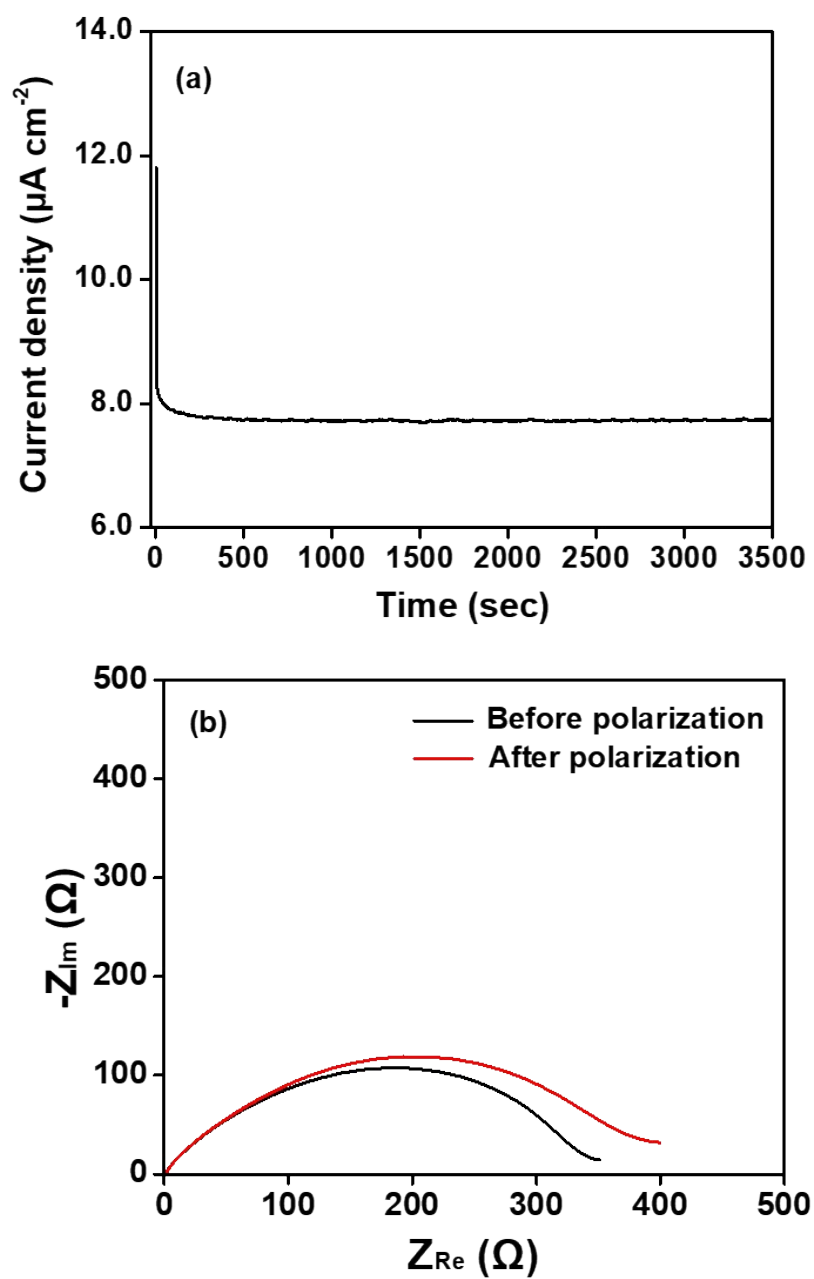

**Fig. S5.** (a) DC polarization curve and (b) AC impedance spectra of the surface-modified Li symmetric cell with the base electrolyte.

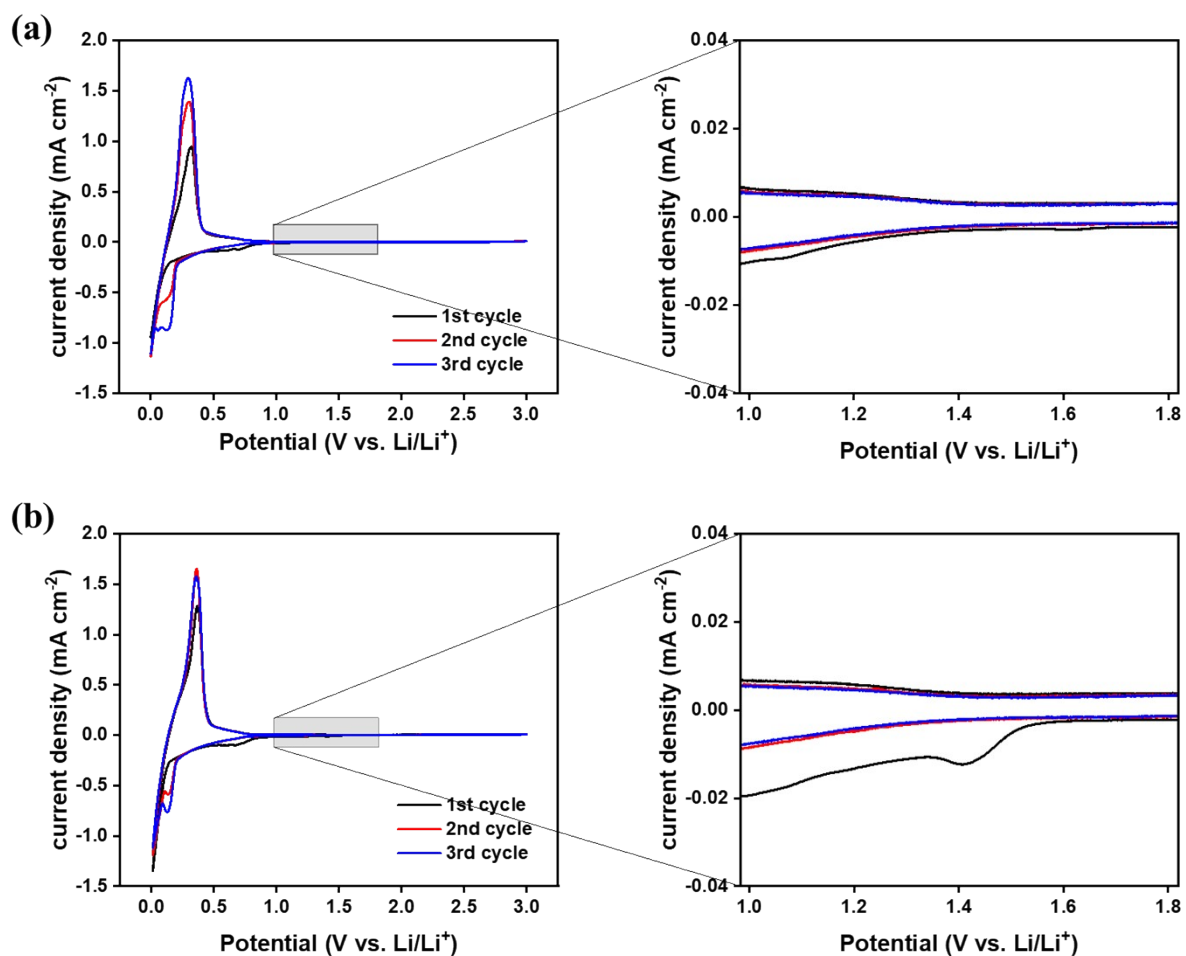

**Fig. S6.** Cyclic voltammograms of Li/graphite half-cells using a base electrolyte (a) without and (b) with 0.5 wt.% LiMPTFSI.

**Table S1.** The values of  $R_b$ ,  $R_{SEI}$ , and  $R_{ct}$  in the cells with different electrolytes.

| Electrolyte            | $R_b$ ( $\Omega$ ) | $R_{SEI}$ ( $\Omega$ ) | $R_{ct}$ ( $\Omega$ ) |
|------------------------|--------------------|------------------------|-----------------------|
| Base electrolyte       | 2.86               | 3.32                   | 12.11                 |
| With 0.5 wt.% LiMPTFSI | 2.66               | 4.83                   | 8.33                  |



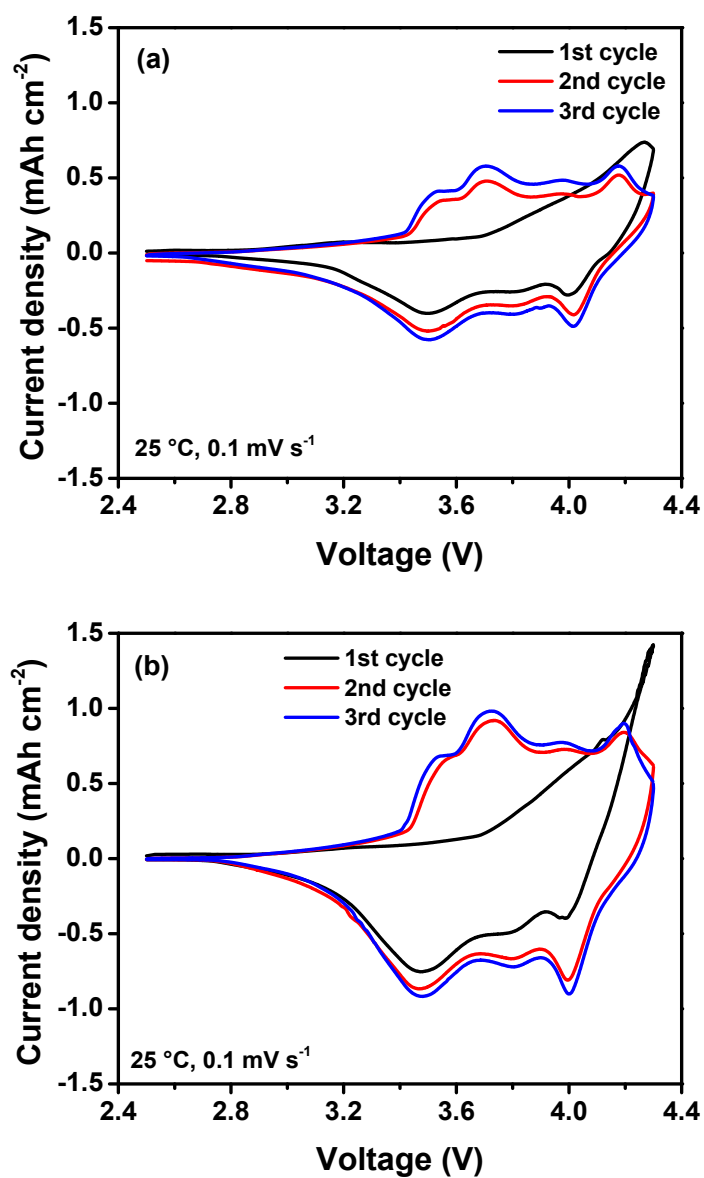

**Fig. S7.** CV curves of graphite/NCM full cells using base electrolyte (a) without and (b) with 0.5 wt.% LiMPTFSI.

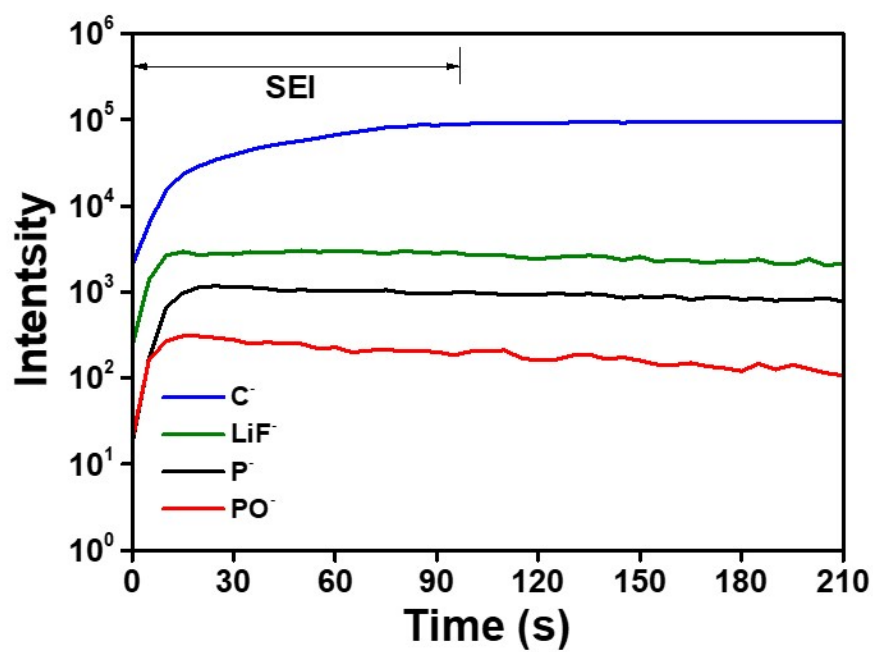

**Fig. S8.** ToF-SIMS depth profiles of a graphite anode with a base electrolyte after pre-cycling.

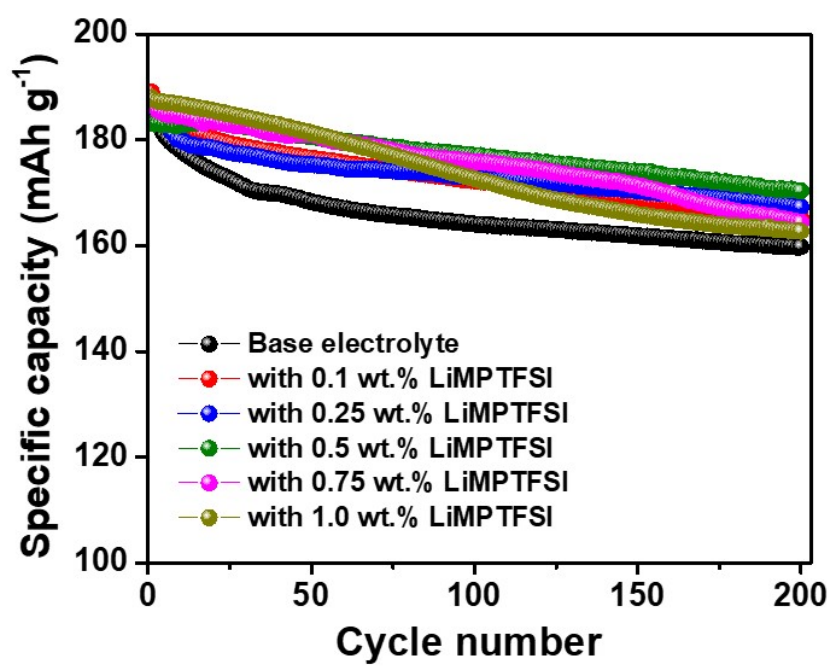

**Fig. S9.** Cycling performance of the Gr/NCM full cells with liquid electrolytes containing different amounts of LiMPTFSI at 1.0 C rate and 25 °C.

(a)

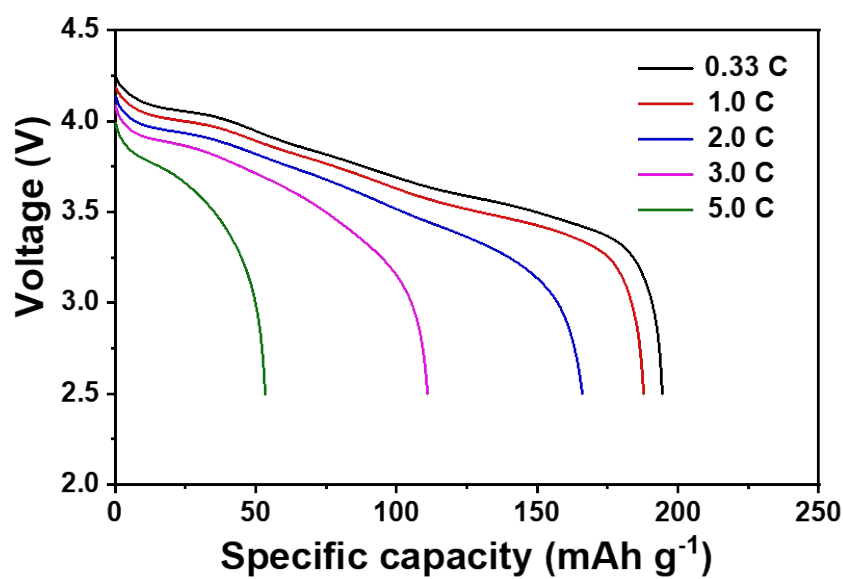

(b)

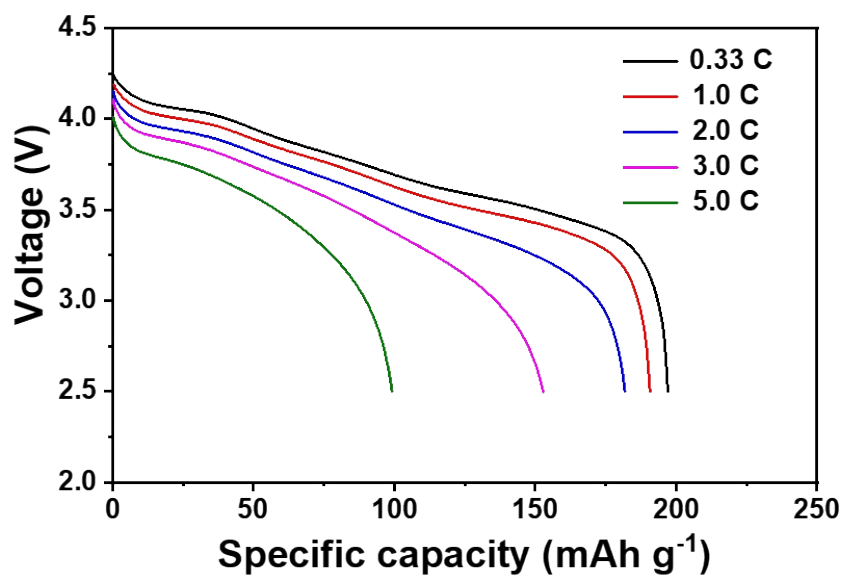

**Fig. S10.** Discharge curves of the Gr/NCM full cells using a base electrolyte (a) without and (b) with 0.5 wt.% LiMPTFSI at different C rates.

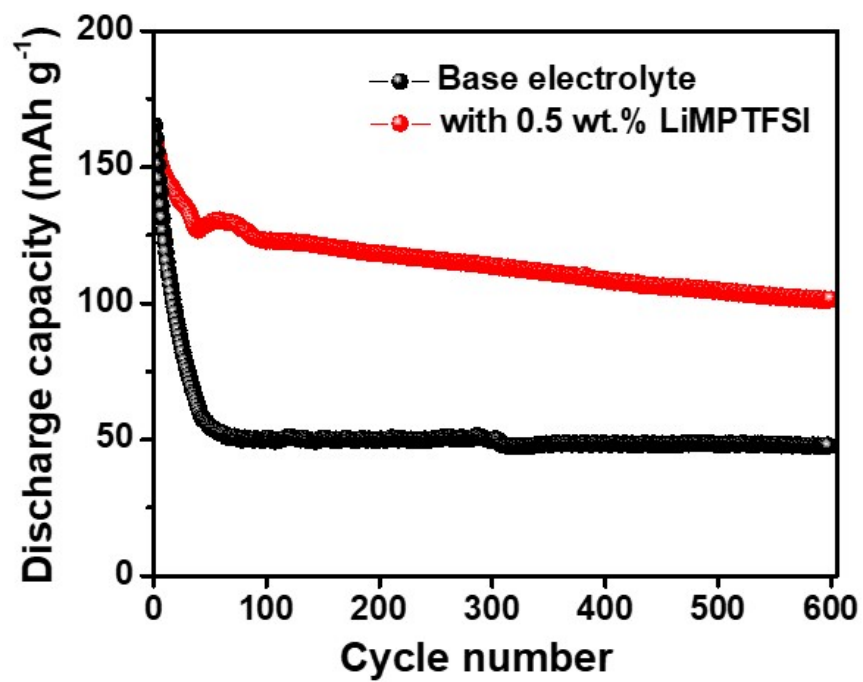

**Fig. S11.** Cycling performance of the Gr/NCM full cells using a base electrolyte with and without 0.5 wt.% LiMPTFSI at 2.0 C rate and 25 °C.

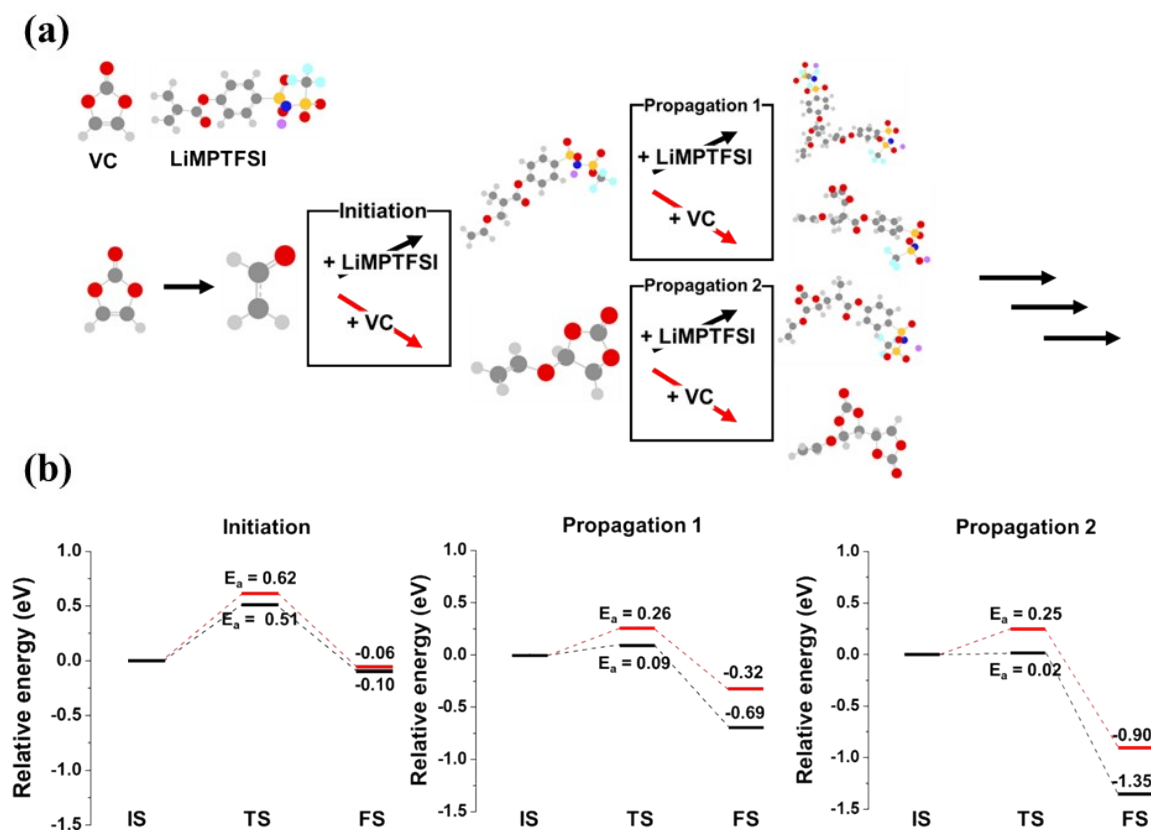

**Fig. S12.** (a) Schematic illustration and (b) relative energy diagram for polymerization of VC with another VC or LiMPTFSI. IS, TS, and FS denote initial state, transition state, and final state, respectively.

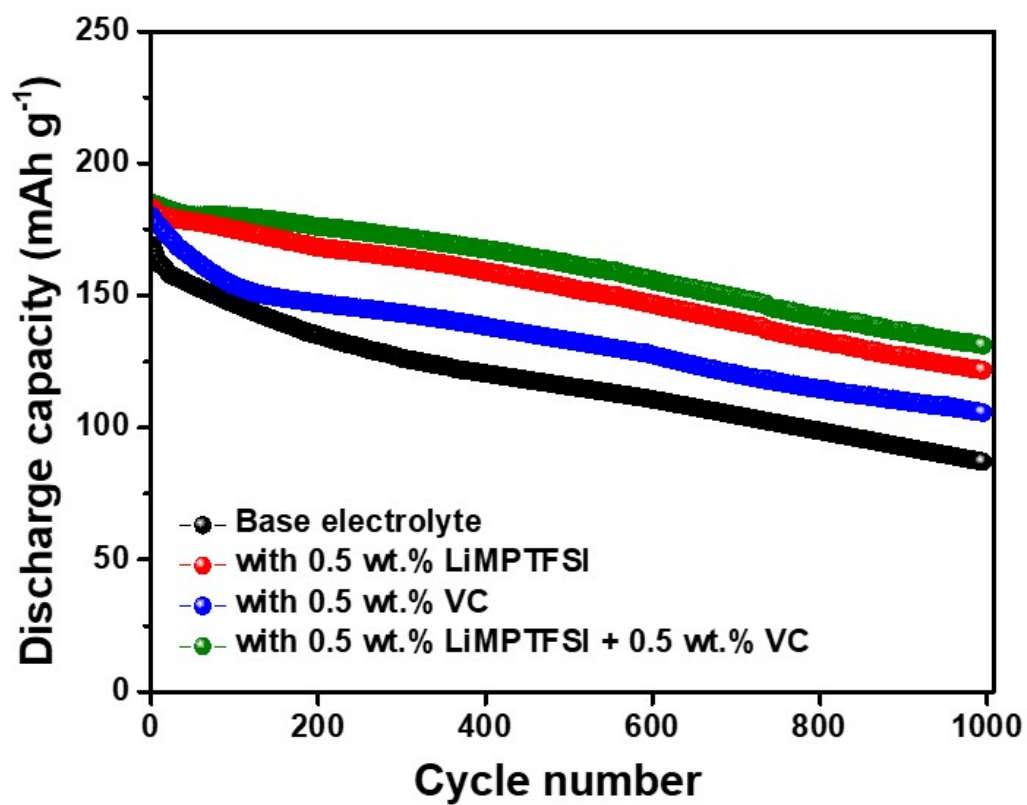

**Fig. S13.** Cycling performance of the Gr/NCM full cells using a liquid electrolyte containing different types of additives at a rate of 1.0 C.

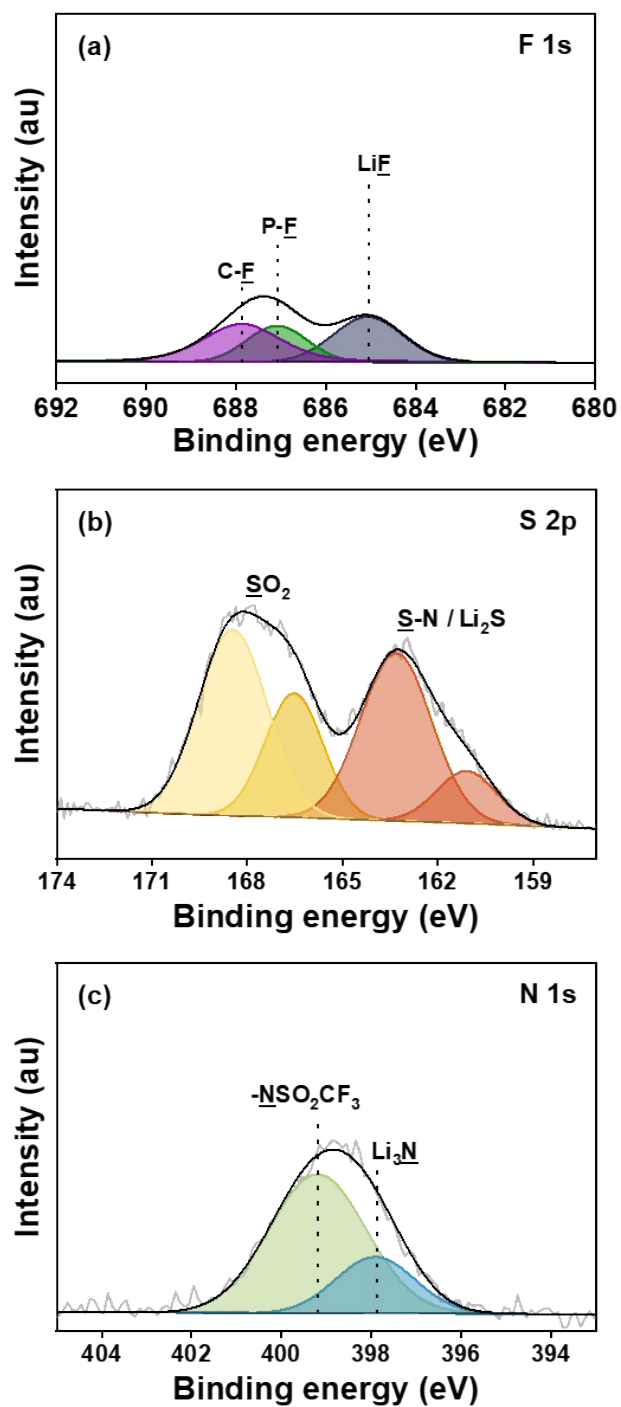

**Fig. S14.** (a) F 1s, (b) S 2p and (c) N 1s XPS spectra of the surface of the graphite anode cycled in a base electrolyte containing 0.5 wt.% LiMPTFSI after pre-cycling.



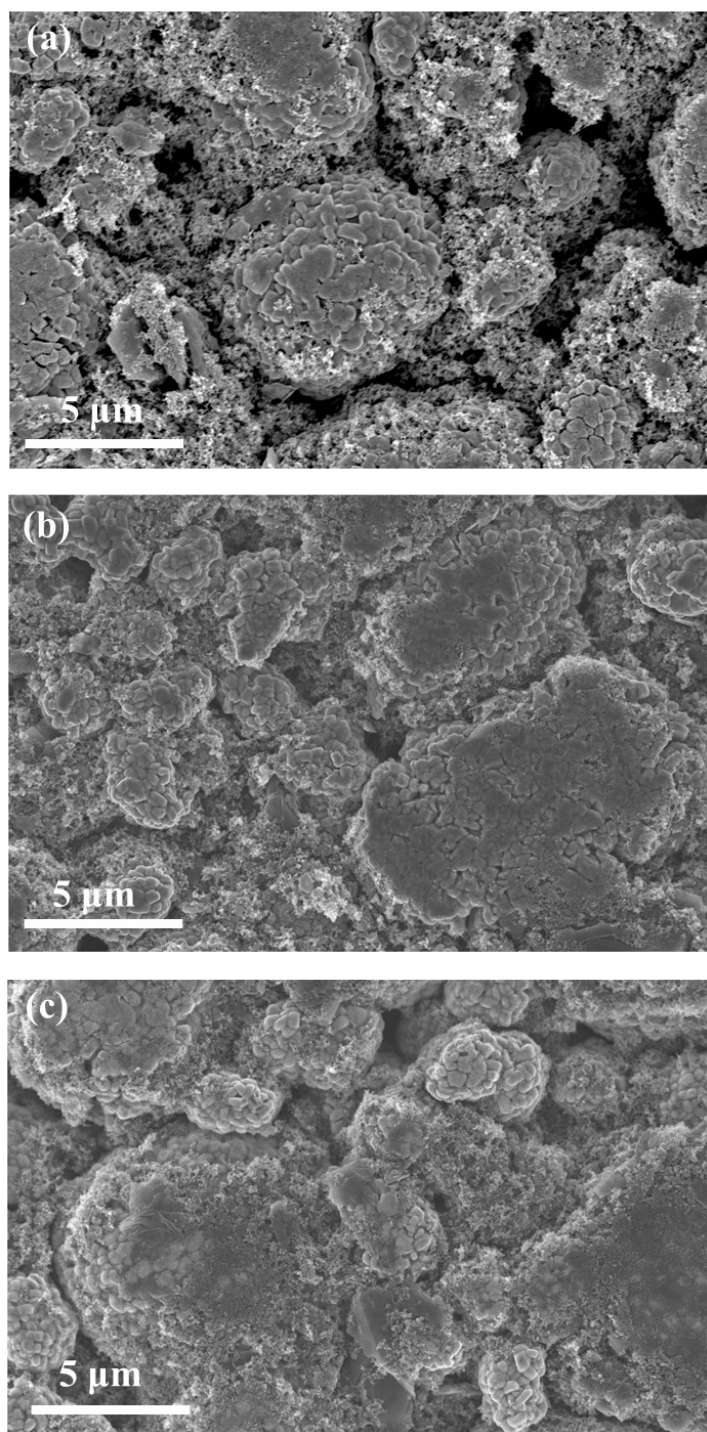

**Fig. S15.** SEM images of (a) pristine NCM cathode and NCM cathodes after the 500th cycle in a (b) base electrolyte and (c) with 0.5 wt.% LiMPTFSI.

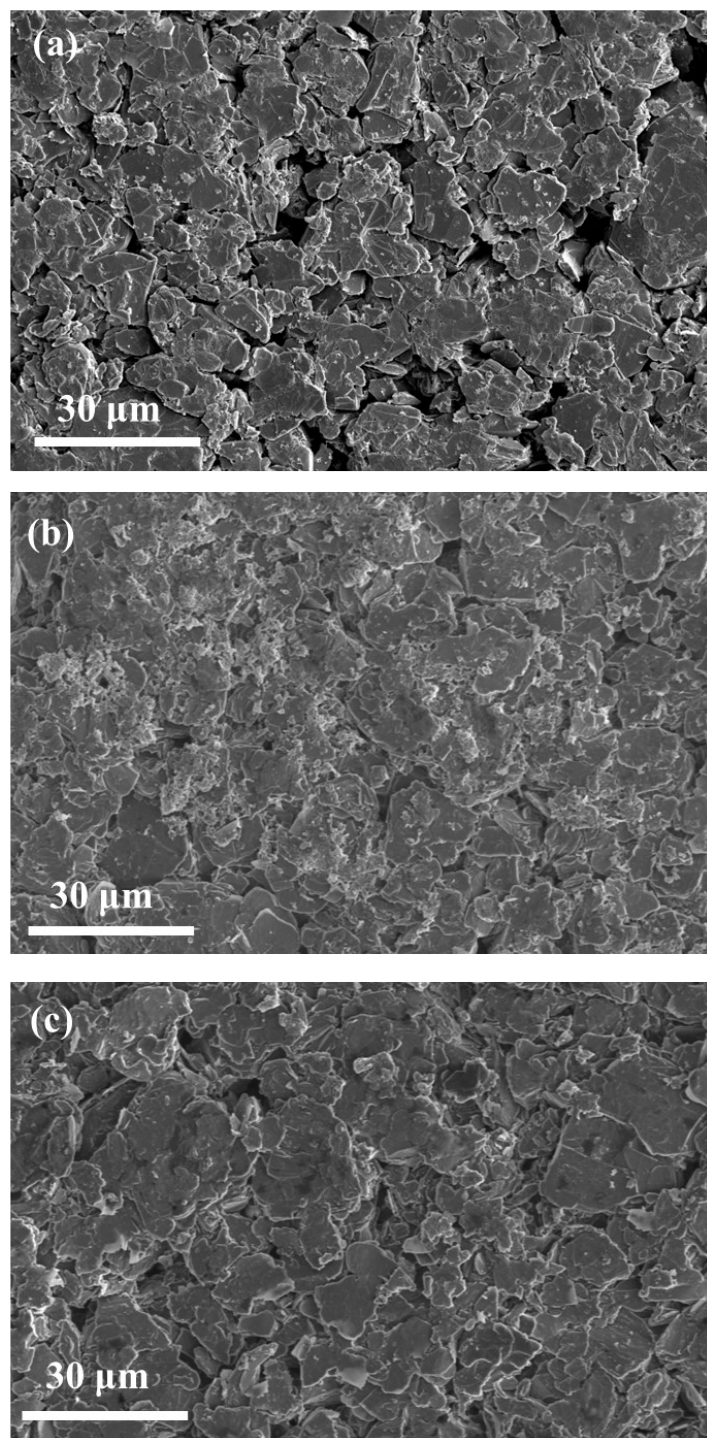

**Fig. S16.** SEM images of (a) a pristine graphite anode and graphite anodes after the 500th cycle in a (b) base electrolyte and (c) with 0.5 wt.% LiMPTFSI.

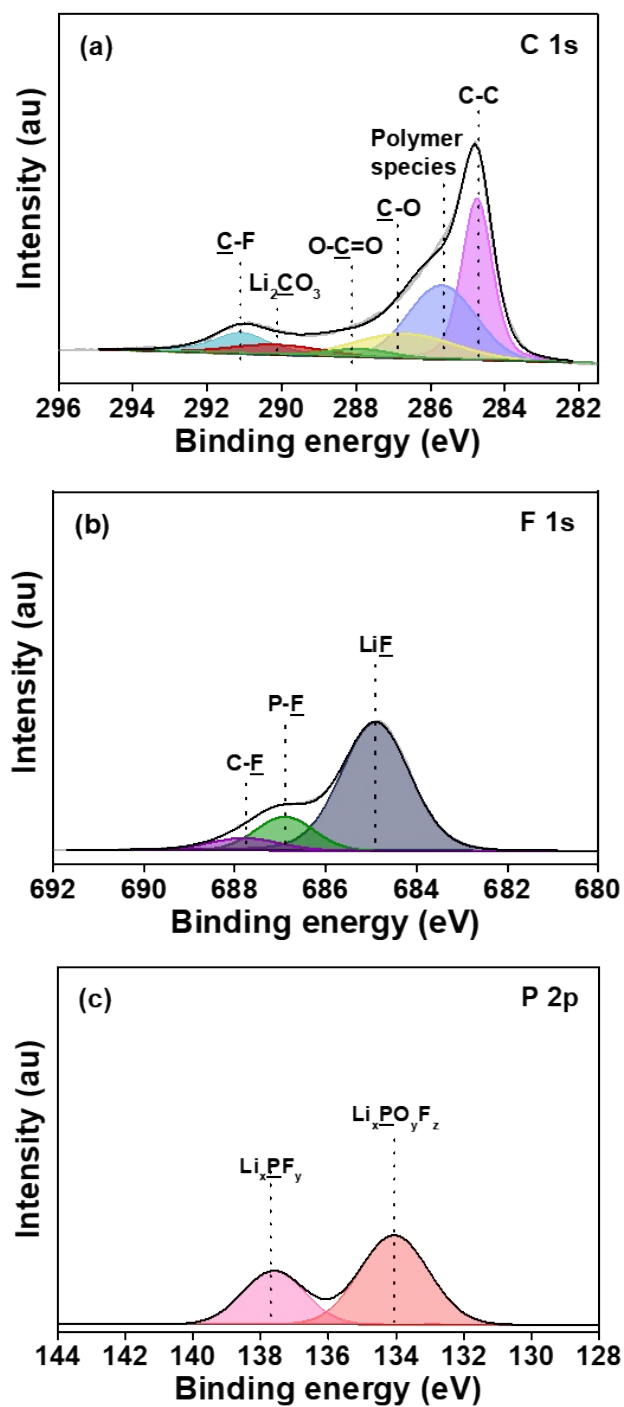

**Fig. S17.** (a) C 1s, (b) F 1s and (c) P 2p XPS spectra of the surface of the graphite anode after pre-cycling using a base electrolyte.

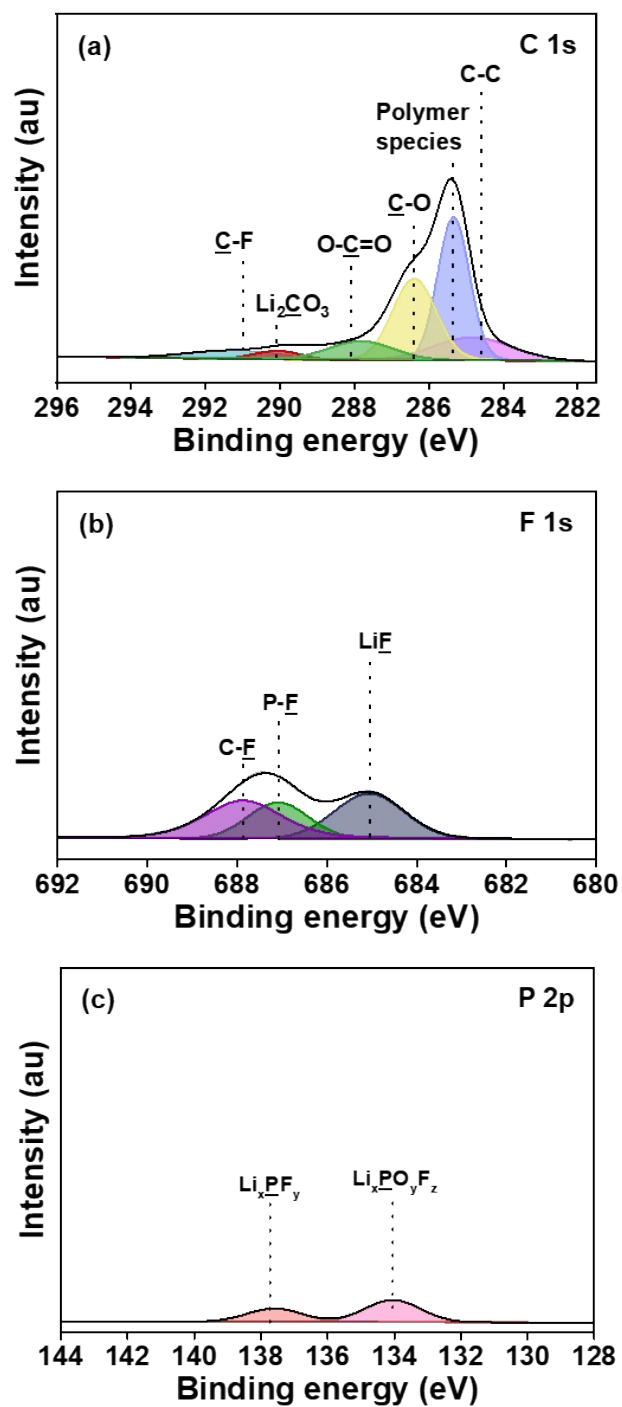

**Fig. S18.** (a) C 1s, (b) F 1s and (c) P 2p XPS spectra of the surface of a graphite anode after pre-cycling using a base electrolyte with 0.5 wt.% LiMPTFSI.
